# Supplementary material for: In vivo kinetics of early, non-random methylome and transcriptome changes induced by DNA-hypomethylating treatment in primary AML blasts
Source: PubMed Central journal article supplement (PMC10169639; doi:10.1038/s41375-023-01876-2), 2023-04-06
Supplement: 41375_2023_1876_MOESM1_ESM.pdf [file 41375_2023_1876_MOESM1_ESM.pdf]

## Supplementary Figure 1

|                | <b>AML blasts</b>                                | <b>T cells</b>                        | <b>analyses</b>                |
|----------------|--------------------------------------------------|---------------------------------------|--------------------------------|
| <b>cycle 1</b> | <b>28 patients</b><br>day 15 vs. day 8 vs. day 0 | <b>16 patients</b><br>day 8 vs. day 0 | methylation                    |
|                | <b>23 patients</b><br>day 8 vs. day 0            |                                       | methylation +<br>transcriptome |
| <b>cycle 2</b> | <b>6 patients</b><br>day 8 vs. day 0             |                                       | methylation                    |

**Workflow of analyses and patient samples used in this study.** Methylation analyses (Illumina 450K arrays) were performed of serially sorted blasts from 28 patients (day 0, day 8 and day 15) and T cells from 16 patients. Transcriptomes (Affymetrix expression arrays) were generated of 23 (day 0 and day 8) of these patients. Methyomes of cycle 2 samples (day 0 and day 8) were analyzed of 6 patients (day 0 and day 8 of both cycles, respectively).

## Supplementary Figure 2

**A**

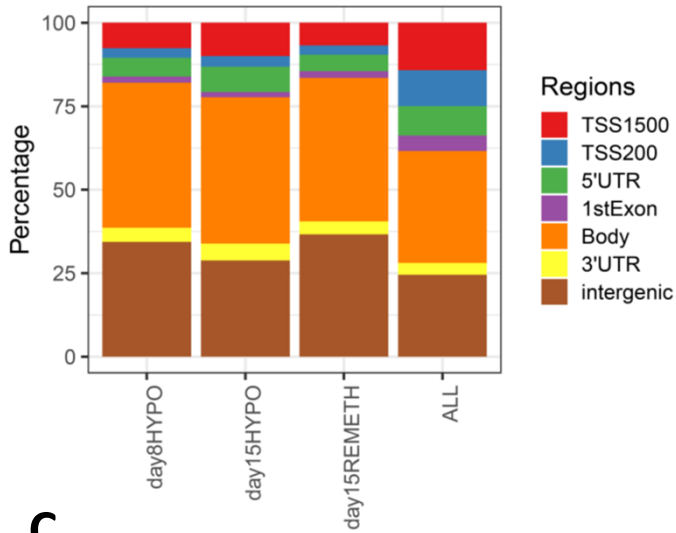

**B**

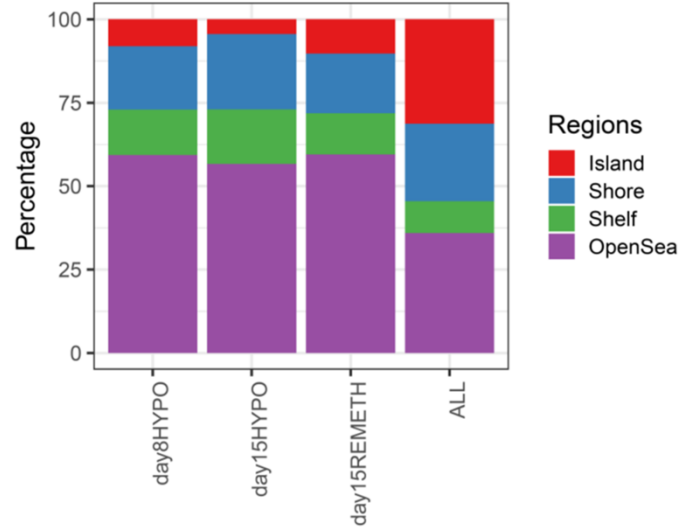

**C**

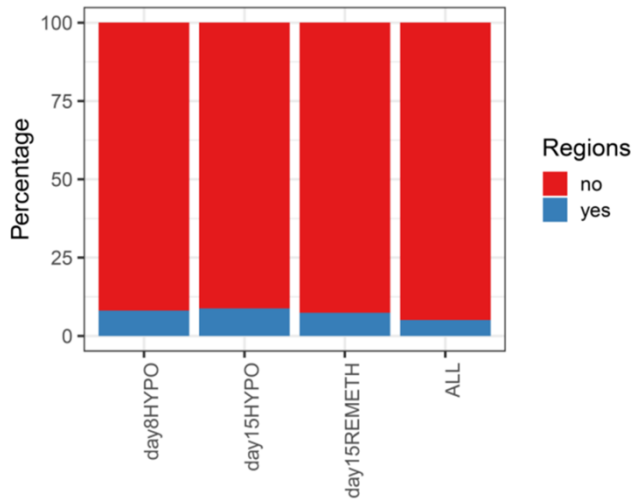

Regional distribution of CpGs significantly demethylated over all patients at day 8 ("day8HYPO"), day15 ("day15HYPO") and remethylated at day 15 ("day15REMETH") compared to all CpGs on the 450K array ("ALL"): Shown as percentages of 100% for (A) genic regions, (B) genomic regions and (C) repetitive elements.

## Supplementary Figure 3

**A**

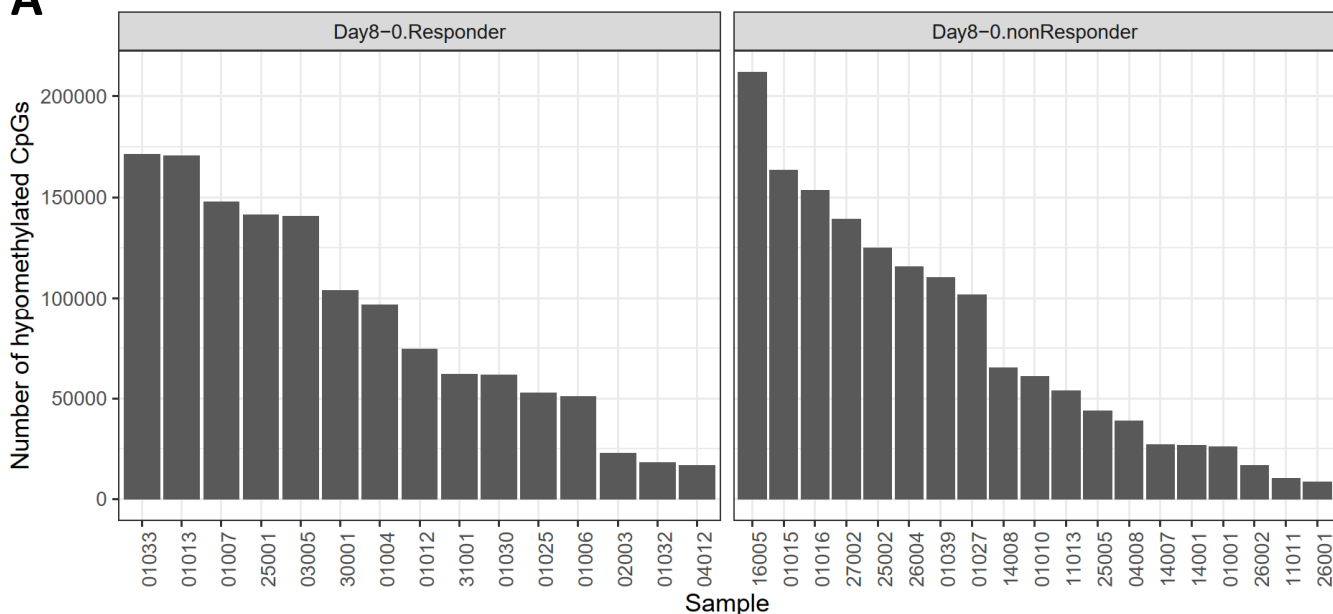

**B**

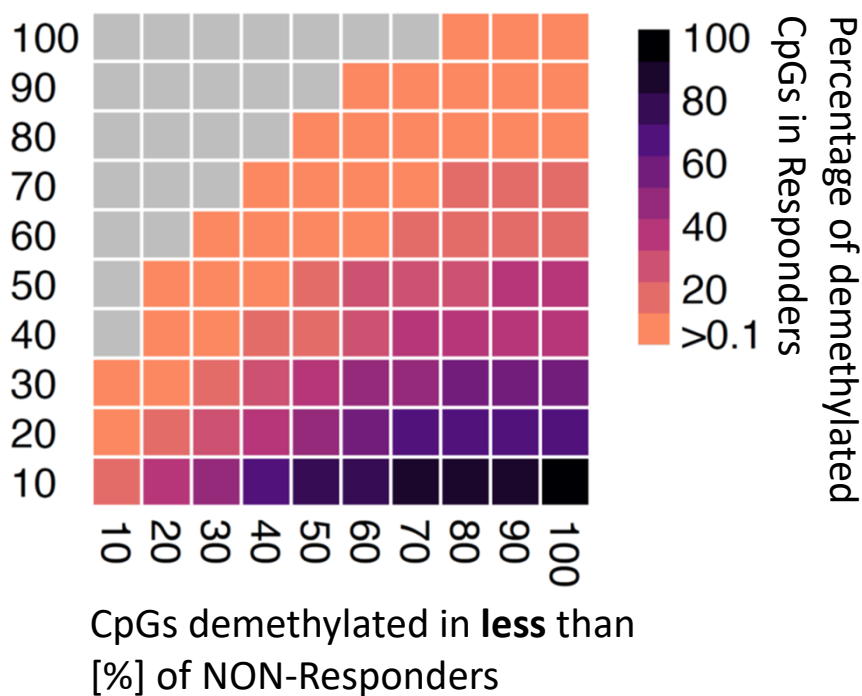

(A) Bar plot of demethylated CpGs at d8 (vs d0,  $FDR < 0.05$ ,  $\beta < -0.01$ ) per individual patient. Patients were grouped for their clinical response ("responders" left, "non-responders" right). (B) Correlation matrix of CpGs demethylated in responders compared to non-responders. The color code represents the overlap as a percentage of de-methylated CpGs in the responder group.

# Supplementary Figure 4

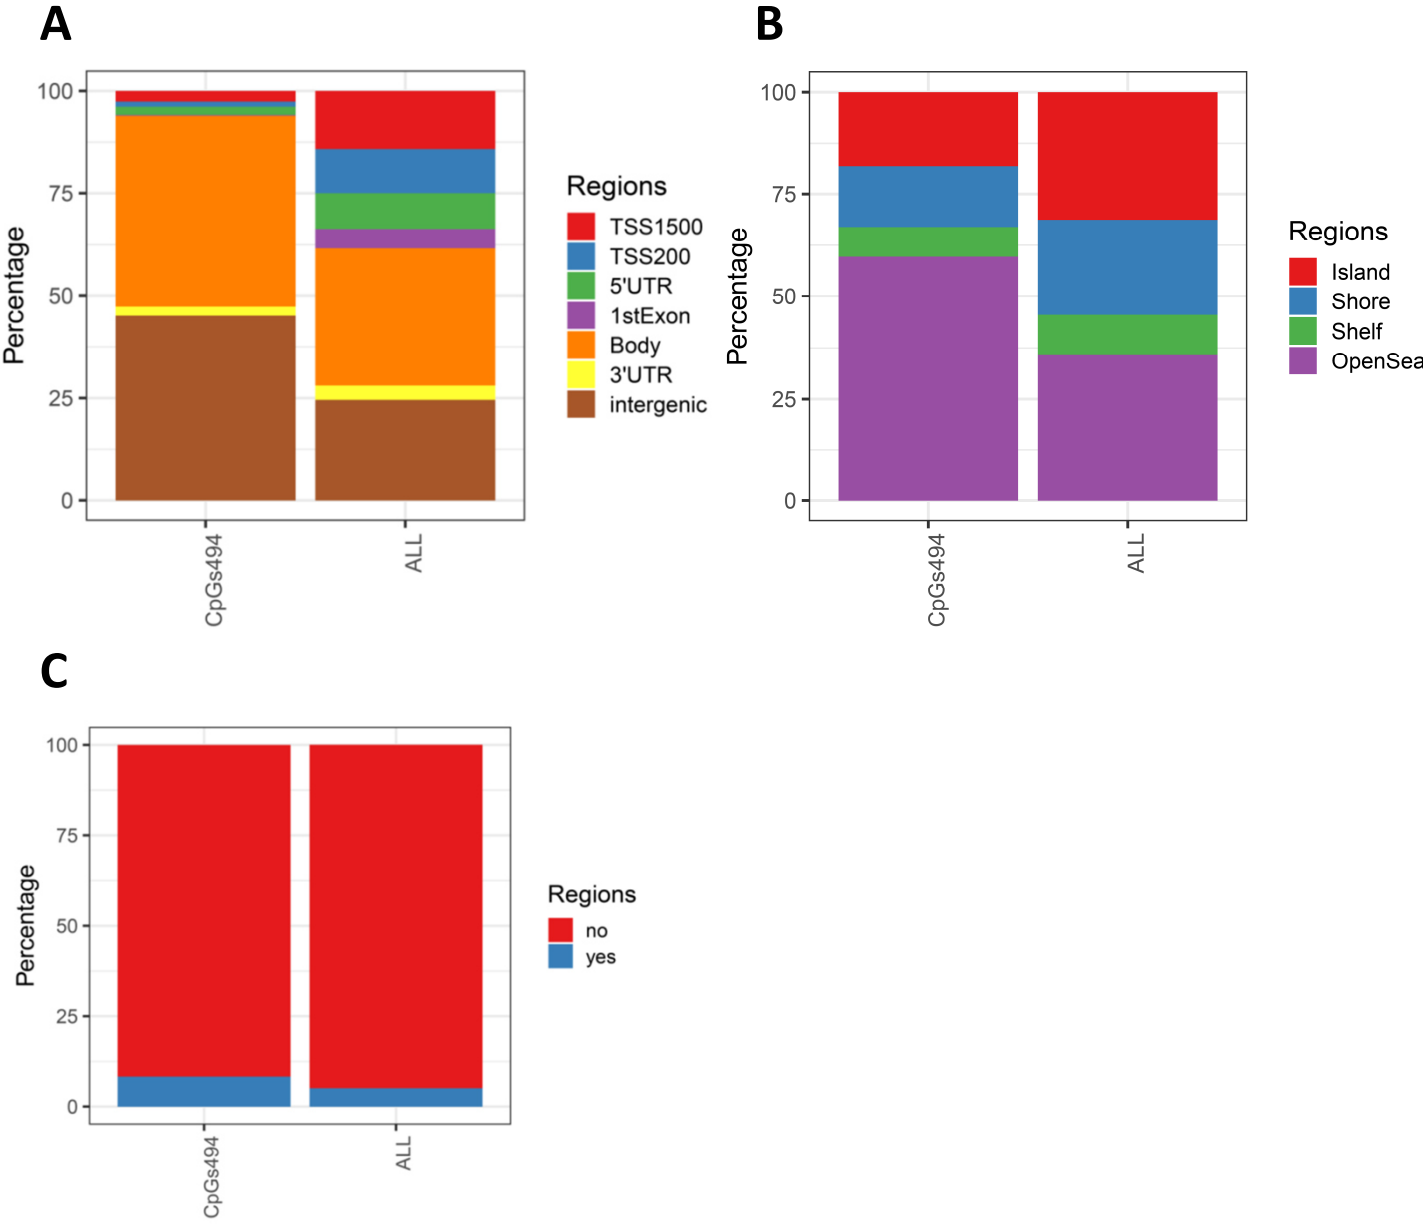

Regional distribution of the 494 non-randomly demethylated at day 8 ("CpGs494") compared to all CpGs on the 450K array ("ALL"): Shown as percentages of 100% for (A) genic regions, (B) genomic regions and (C) repetitive elements.

# Supplementary Figure 5

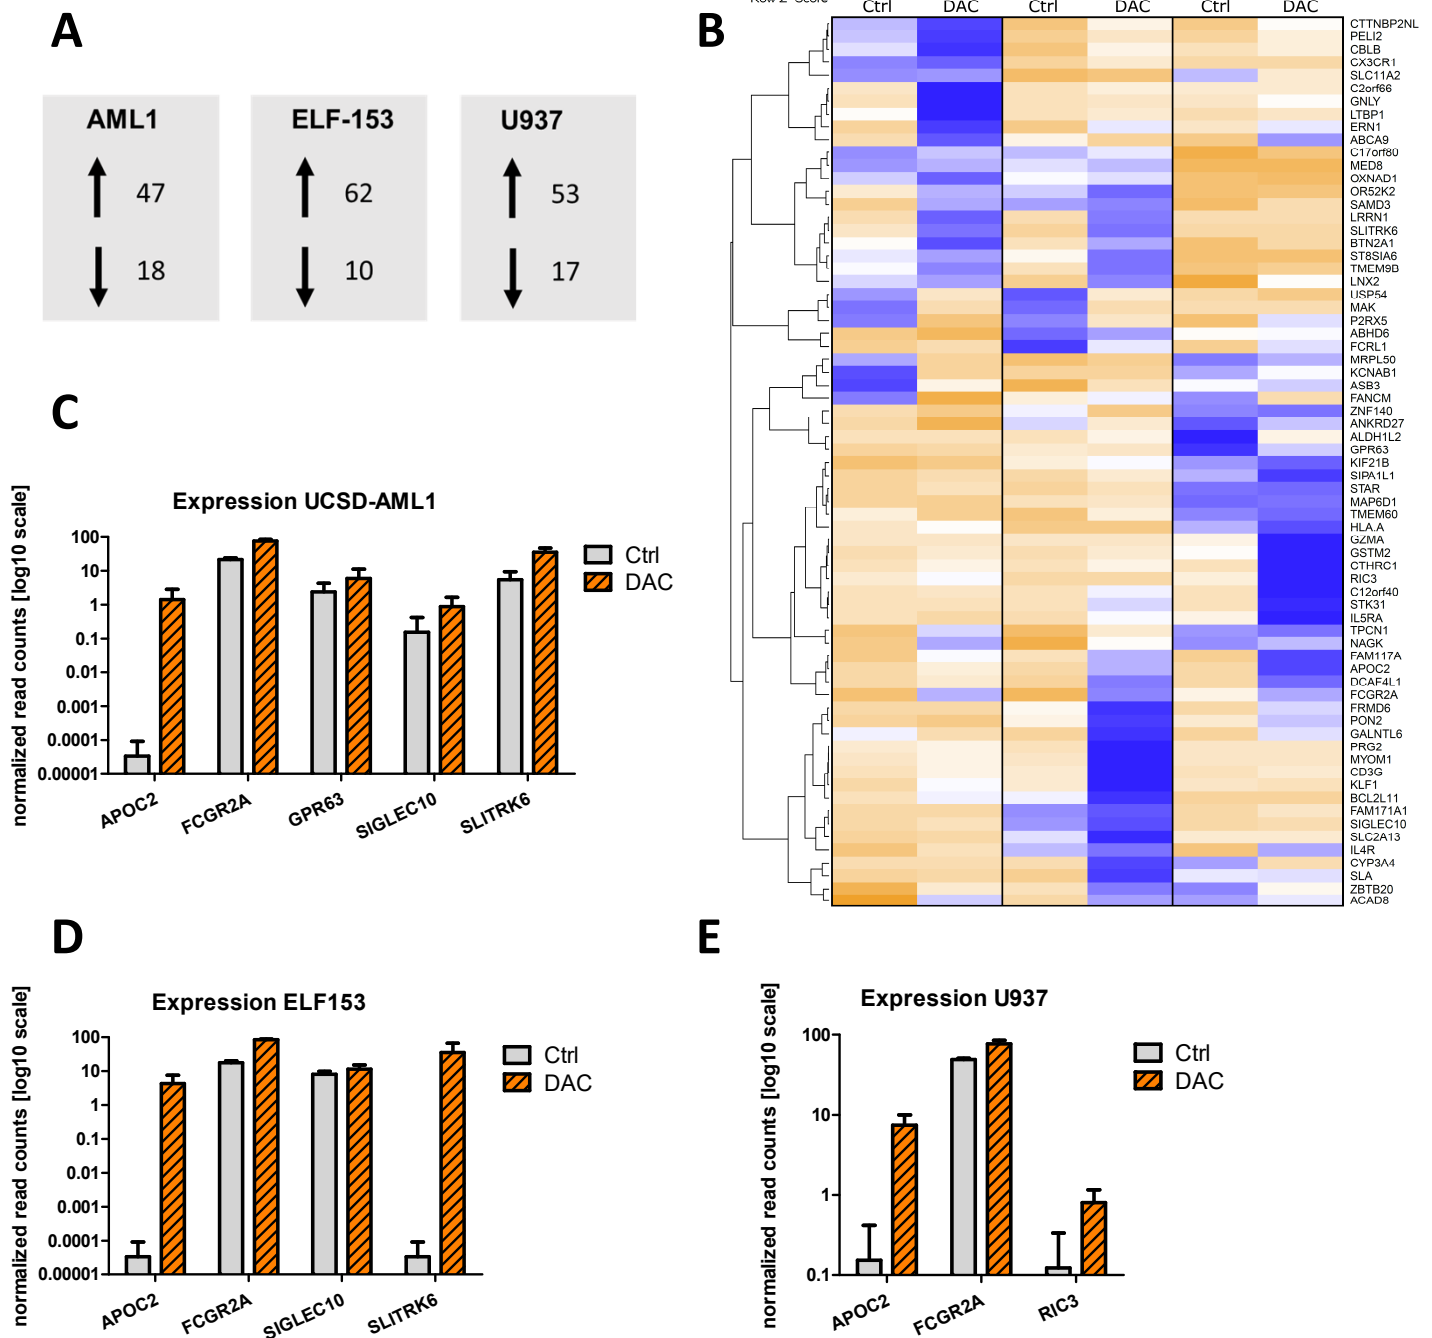

Validation of gene expression in 3 AML cell lines by RNA-seq (each condition [Ctrl = untreated, DAC] shown as mean of 3 replicates): (A) Up(↑)- and down(↓)regulation of all genes being anticorrelated in DECIDER patients and detected in 3 cell lines in numbers and (B) as a heatmap of Z-score converted mean normalized read counts. (C-E) Mean normalized read counts of selected genes (see Figure 5C) in 3 AML cell lines.
