# Supplementary material for: In vivo kinetics of early, non-random methylome and transcriptome changes induced by DNA-hypomethylating treatment in primary AML blasts
Source: PubMed Central journal article supplement (PMC10169639; doi:10.1038/s41375-023-01876-2), 2023-04-06
Supplement: 41375_2023_1876_MOESM2_ESM.pdf [file 41375_2023_1876_MOESM2_ESM.pdf]

1 ***In vivo* kinetics of early, non-random methylome and transcriptome**  
2 **changes induced by DNA-hypomethylating treatment in primary AML**  
3 **blasts**

4  
5 Gabriele Greve<sup>1\*</sup>, Geoffroy Andrieux<sup>2\*</sup>, Pascal Schlosser<sup>1,3</sup>, Nadja Blagitko-Dorfs<sup>4</sup>, Usama-Ur  
6 Rehman<sup>5</sup>, Tobias Ma<sup>5</sup>, Dietmar Pfeifer<sup>5</sup>, Gerhard Heil<sup>6</sup>, Andreas Neubauer<sup>7</sup>, Jürgen Krauter<sup>8</sup>,  
7 Michael Heuser<sup>9</sup>, Helmut R Salih<sup>10</sup>, Konstanze Döhner<sup>11</sup>, Hartmut Döhner<sup>11</sup>, Björn  
8 Hackanson<sup>12</sup>, Melanie Boerries<sup>2, 13</sup>, Michael Lübbert<sup>5, 13</sup>

9 \*These authors contributed equally

10

11 **Supplementary Methods**

12

13 **Material & Methods**

14 **Patients**

15 One treatment cycle was scheduled for 28 days; for 6 patients (4 overlap with the 28 patients)  
16 it was possible to additionally obtain purified blood blasts (days 0 and 8) also during cycle 2.  
17 Additionally, matched T cells at cycle 1, day 0 and 8 were isolated from 16 patients (10 overlap  
18 with the 28 patients) (detailed information on patients and sample usage are given in Suppl.  
19 Fig. 1). Blasts were sorted using anti-CD34 and -CD117 and T cells with anti-CD3 MACS  
20 microbeads, respectively (median purity >90%). Patients provided written informed consent for  
21 the research use of the clinical data and biomaterial in accordance to the Declaration of  
22 Helsinki.

23

24

## 25 **450K Annotation**

26 Using the IlluminaHumanMethylation450kanno.ilmn12.hg19 annotation R package, every  
27 single CpG located on the gene body was annotated with 5'UTR, 1<sup>st</sup> exon, gene body, 3'UTR.  
28 We also annotated CpGs having a close proximity with promoter regions, i.e. transcription start  
29 site (TSS). TSS1500 and TSS200 labels define CpGs located up to 1500bp and 200bp  
30 downstream the TSS respectively. Other CpGs are considered as intergenic. The relation to  
31 CpG islands was also retrieved from the same annotation package. Each CpG is either located  
32 on CpG Islands, Shores, Shelves or Open sea. Based on the Price et al. annotation (1), CpGs  
33 overlapping with known repetitive elements are annotated as "repetitive" whenever the entire  
34 probe was in a region of repetitive DNA. For each annotation layer (i.e. gene region, proximity  
35 to island, repetitive elements), we performed an enrichment analysis to identify over- and  
36 underrepresented regions in demethylated CpG lists compared to the 450K array distribution.  
37 Using Fisher's exact test, any regions with an odds ratio above 1 and p-value below 0.05 was  
38 considered as significantly enriched. Respectively, regions with odds ratios below 1 and p-  
39 values below 0.05 were considered as depleted.

40

## 41 **Single sample delta beta analysis**

42 A single-sample analysis was performed to retrieve the demethylated CpGs in every single  
43 patient. Delta beta was calculated for each patient by subtracting the beta value at day 8 from  
44 the beta value at day 0. CpGs with a delta beta below -0.1 were considered as demethylated.  
45 The p-value of the overlapping demethylated CpGs across the 28 patients in cycle 1 (6 patients  
46 in cycle 2) was assessed using a bootstrap analysis followed by an ANOVA test. To adjust for  
47 a global effect, we introduced a weighted random selection of 28 lists of CpGs. These 28  
48 random lists contain the same number of CpGs as the measured ones. They also follow the  
49 same distribution of gene regions as the measured ones. Then the overlap across these  
50 random lists was calculated. This selection was repeated 1000 times. The number of  
51 overlapping demethylated CpGs in at least 1 to 28 samples was then compared between the

52 28 measured and the 28 randomized CpGs lists, generated 1000 times. Two cubic regression  
53 models were fitted to each set as described in (2). The full model captures the specific  
54 trajectory for each measured and randomized CpGs separately, whereas the reduced model  
55 specifies a single set of parameters for two sets. The goodness of the fit between the full and  
56 the reduced models was resolved by ANOVA where p-value indicates the probability that the  
57 two models are the same. Therefore, a significant p-value demonstrated a non-random overlap  
58 of demethylated CpGs.

59

## 60 **Expression arrays**

61 Total RNA of serially sorted blasts from 23 patients (at day 0 and 8) was isolated by TRIZOL  
62 (Thermo Fisher Scientific, Waltham, MA, USA) extraction and RNA phase was purified with  
63 the Qiagen RNeasy MinElute Cleanup Kit. Total RNA concentration was measured with the  
64 Qubit Fluorometer (Thermo Fisher Scientific) and integrity was determined by fragment  
65 analysis. RNA samples with RQN > 8.5 were further processed with the Affymetrix WT Plus kit  
66 and hybridized to GeneChip Human Gene 2.0 ST expression arrays (Affymetrix, Santa Clara,  
67 CA, USA) as described by the manufacturer (3). To avoid a possible batch effect, samples  
68 were pipetted in triplicates and randomized across and within plates.

69

## 70 **Clinical response correlation with demethylation**

71 The clinical outcome of patients (methylation data available from day 8 and day 0) treated and  
72 evaluated for response within the DECIDER trial (n=34) was scored by the response criteria  
73 applied for the entire patient data set of that trial. We grouped patients as either responders  
74 (complete remission with or without incomplete regeneration; partial remission, antileukemic  
75 effect, stable disease; n=15) or non-responders (progressive disease; n=19).

76 We performed differential analyses comparing responder and non-responder groups using the  
77 limma R package, performed in a similar manner as the groupwise methylation analysis  
78 comparing day 8 vs day 0.

79

## 80 **RNA extraction, cDNA synthesis and qRT-PCR**

81 RNA was isolated using NucleoSpin® RNA II Kit (Macherey-Nagel, Dueren, Germany),  
82 DNase-digested and transcribed using the SuperScript Reverse Transcriptase III (Invitrogen,  
83 Thermo Fisher Scientific, Waltham, MA, USA) following the manufacturer's recommendations.  
84 Quantitative real-time PCR (qRT-PCR) was performed using the LightCycler® 480 SYBR  
85 Green I on the LightCycler® 480 Instrument (Roche Life Science, Penzberg, Germany)  
86 according to the manufacturer's instructions. Relative *IFI27* gene expression was determined  
87 using Pfaffl method on *RNF20* and *TGDS* as reference genes(4). Following *IFI27* and *TGDS*  
88 primers (written 5' to 3') were used: *IFI27*<sub>fw</sub>, GCAGTCACTGGGAGCAACT; *IFI27*<sub>rev</sub>,  
89 GAGGGGCAGGGAGCTAGTA; *TGDS*<sub>fw</sub>, GCCAGAGTGGAGAAGTTTATTTATGTCAGC;  
90 *TGDS*<sub>rev</sub>, AGGATTTGTAGGTTGTTTGGGTGAAGATT. *RNF20* primers were purchased from  
91 Primerdesign Ltd (Southampton, UK). P-values were calculated using Student's t-test (paired,  
92 two-sided).

93

## 94 **Re-Analysis of RNA-sequencing data**

95 See cell line characteristics and detailed methods in Greve et al. (5) and Meier et al. (6). All  
96 three cell lines, UCSD-AML1, ELF-153 and U937, were selected for their distinct (cyto)genetic  
97 features which closely resemble patients' molecular characteristics often seen in the clinic. Cell  
98 lines were treated with either 100 nM (UCSD-AML1 and ELF-153) or 200 nM (U937) DAC and  
99 subsequent RNA-sequencing was performed with at least 35 million reads / sample. Analysis  
100 of sequencing data was performed as described in (5,6).

101

## 102 **References**

- 103 1. Price ME, Cotton AM, Lam LL, Farré P, Emberly E, Brown CJ, et al. Additional  
104 annotation enhances potential for biologically-relevant analysis of the Illumina Infinium  
105 HumanMethylation450 BeadChip array. *Epigenetics Chromatin*. 2013;6:4.
- 106 2. Mar JC, Quackenbush J. Decomposition of gene expression state space trajectories.  
107 *PLoS Comput Biol*. 2009;5:e1000626.

- 108 3. Blagitko-Dorfs N, Schlosser P, Greve G, Pfeifer D, Meier R, Baude A, et al.  
109 Combination treatment of acute myeloid leukemia cells with DNMT and HDAC  
110 inhibitors: predominant synergistic gene downregulation associated with gene body  
111 demethylation. *Leukemia*. 2019;33:945–56.
- 112 4. Pfaffl MW. A new mathematical model for relative quantification in real-time RT-PCR.  
113 *Nucleic Acids Res*. 2001;29:45e–45.
- 114 5. Greve G, Schüler J, Grüning BA, Berberich B, Stomper J, Zimmer D, et al. Decitabine  
115 Induces Gene Derepression on Monosomic Chromosomes: In Vitro and In Vivo Effects  
116 in Adverse-Risk Cytogenetics AML. *Cancer Res*. 2021;81:834–46.
- 117 6. Meier R, Greve G, Zimmer D, Bresser H, Berberich B, Langova R, et al. The  
118 antileukemic activity of decitabine upon PML/RARA-negative AML blasts is supported  
119 by all-trans retinoic acid: in vitro and in vivo evidence for cooperation. *Blood Cancer J*.  
120 2022;12:122.
- 121
